# Supplementary material for: Genomic and transcriptomic evidence of light-sensing, porphyrin biosynthesis, Calvin-Benson-Bassham cycle, and urea production in Bathyarchaeota
Source: PubMed Central journal article supplement (PMC7110647; doi:10.1186/s40168-020-00820-1), 2020-03-31
Supplement: 40168_2020_820_MOESM7_ESM.pdf [file 40168_2020_820_MOESM7_ESM.pdf]

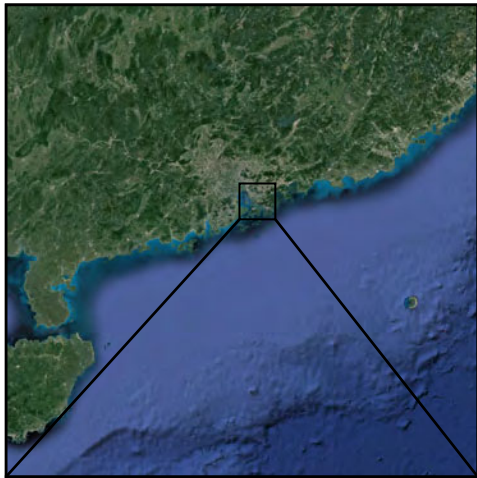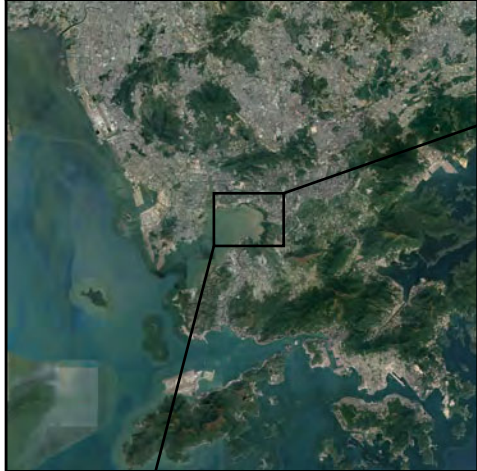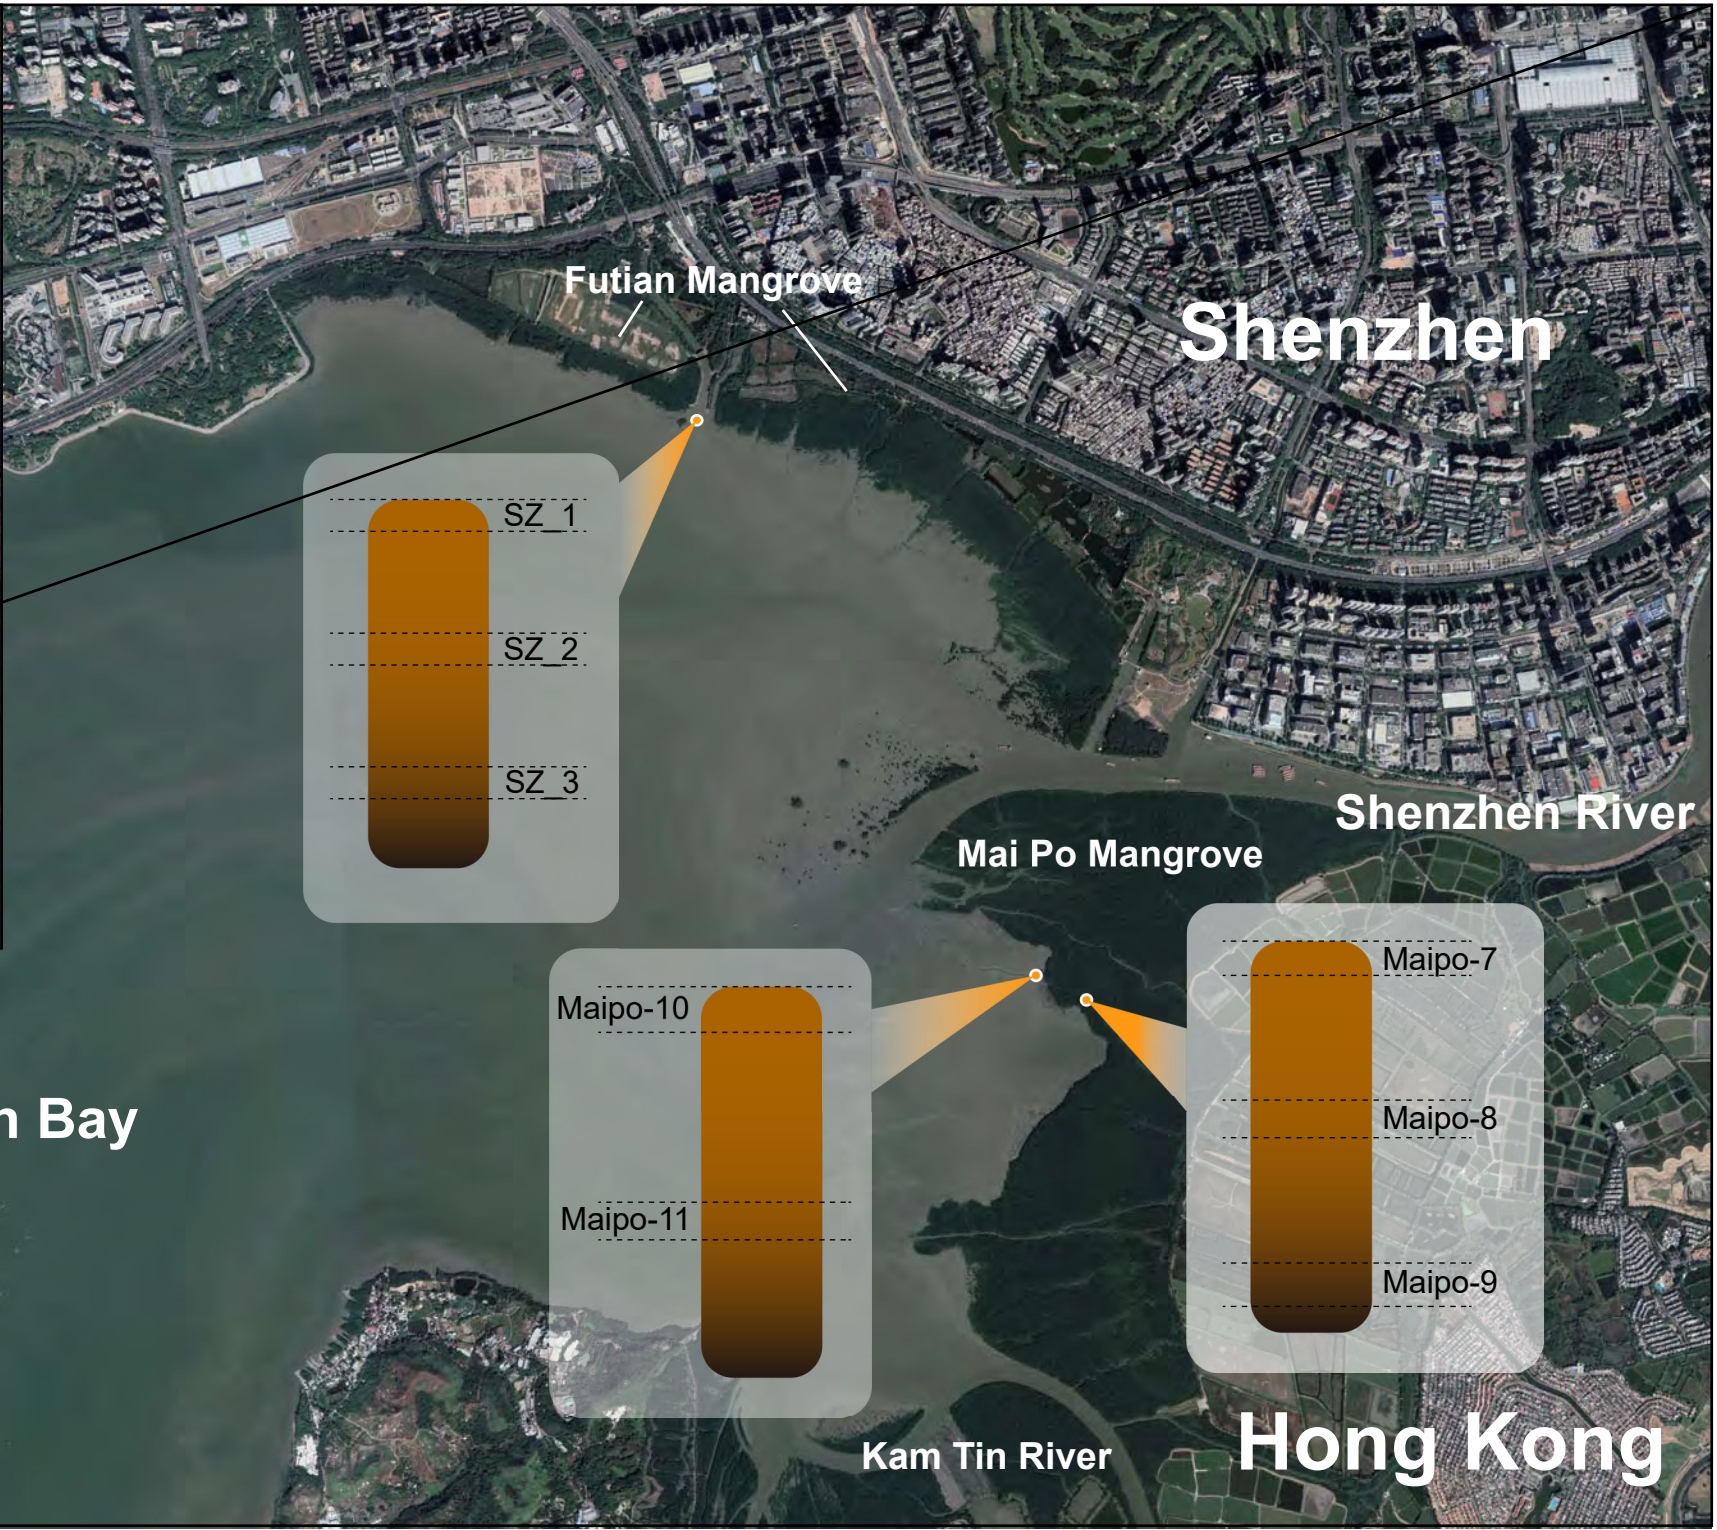

Futian Mangrove

Shenzhen

Shenzhen River

Mai Po Mangrove

Shenzhen Bay

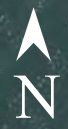

Kam Tin River

Hong Kong

SZ 1

SZ 2

SZ 3

Maipo-10

Maipo-11

Maipo-7

Maipo-8

Maipo-9
