# Supplementary material for: Genomic and transcriptomic evidence of light-sensing, porphyrin biosynthesis, Calvin-Benson-Bassham cycle, and urea production in Bathyarchaeota
Source: PubMed Central journal article supplement (PMC7110647; doi:10.1186/s40168-020-00820-1), 2020-03-31

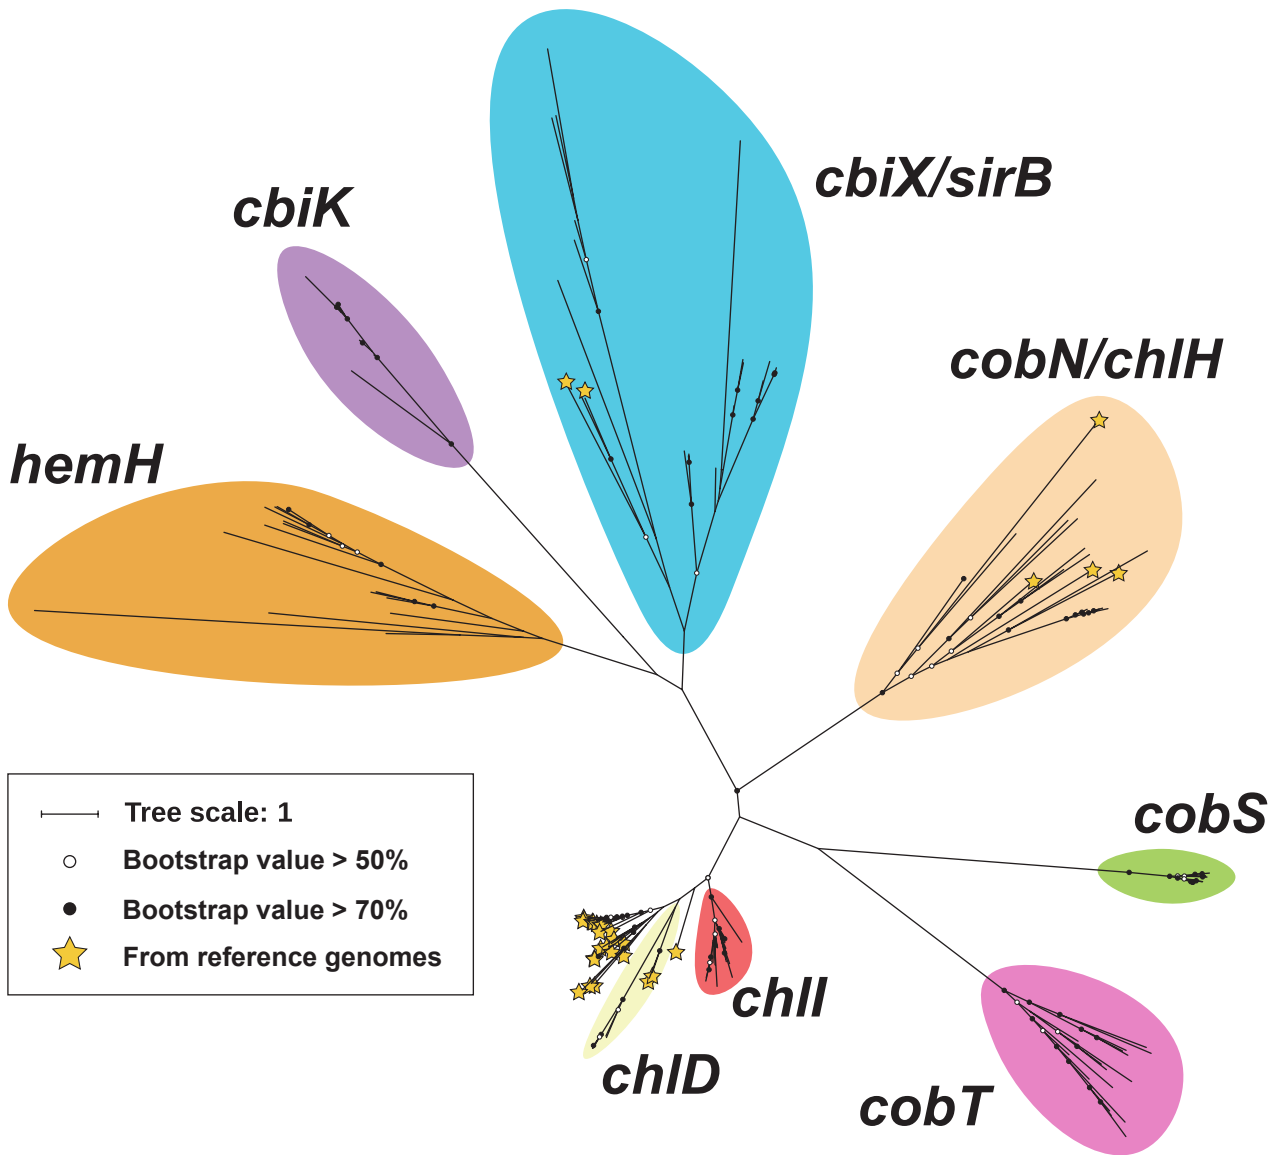

Supplement: 40168_2020_820_MOESM10_ESM.pdf [file 40168_2020_820_MOESM10_ESM.pdf]
